# Supplementary material for: Association of Kidney Function With Development of Alzheimer Disease and Other Dementias and Dementia-Related Blood Biomarkers
Source: PubMed Central journal article supplement (PMC10408272; doi:10.1001/jamanetworkopen.2022.52387), 2023-01-24
Supplement: jamanetwopen-e2252387-s002.pdf [file jamanetwopen-e2252387-s002.pdf]

## Data Sharing Statement

Stocker. Association of Kidney Function With Development of Alzheimer Disease and Other Dementias and Dementia-Related Blood Biomarkers. *JAMA Netw Open*. Published January 24, 2023. doi:10.1001/jamanetworkopen.2022.52387

### Data

**Data available:** No

### Additional Information

**Explanation for why data not available:** Individual patient data will not be made available due to local regulations.
